# Supplementary material
Source: publisher figshare collection journal article supplement (https://future-science-group.figshare.com/ndownloader/files/33036002)
Supplement: Supplementary file 1 [file 33036002]

| Qualification Test | Result | | |
| --- | --- | --- | --- |
| Screening Assay Cut-Point | 1.08 S/N | | |
| Specificity / Confirmatory Assay Cut-Point | % Signal Inhibition = 20.06% | | |
| Sensitivity | Screening Assay – 4.21 ng/mL  Confirmatory Assay – 4.20 ng/mL | | |
| Intra-Assay Statistics (%)-Screening Assay | Level | Concentration  (ng/mL) | RLU Precision (%) |
| NC | N/A | 1.6 |
| LPC | 10 | 1.1 |
| MPC | 100 | 13.6 |
| HPC | 4000 | 13.2 |
| Intra-Assay Statistics (%)-Confirmatory Assay | Level | Concentration  (ng/mL) | % Inhibition Precision |
| NC | N/A | <0.0 |
| LPC | 10 | 1.8 |
| MPC | 100 | 1.2 |
| HPC | 4000 | 0.0 |
| Inter-Assay Statistics (%)-Screening Assay | Level | Concentration  (ng/mL) | RLU Precision (%) |
| NC | N/A | 9.3 |
| LPC | 10 | 8.4 |
| MPC | 100 | 14.3 |
| HPC | 4000 | 15.0 |
| Inter-Assay Statistics (%)-Confirmatory Assay | Level | Concentration (ng/mL) | % Inhibition Precision |
| NC | N/A | >20.0 |
| LPC | 10 | 8.9 |
| MPC | 100 | 1.8 |
| HPC | 4000 | 0.1 |
